# Supplementary material
Source: Springer Nature journal article supplement (https://www.springermedizin.de/resource/supplementary/12887_2011_593_MOESM1_ESM.pdf/9475804)
Supplement: MOESM1 [file 9475804]

**Risk of Bias Related to Assessing the Association of Serious RSV and Environmental Tobacco Smoke (ETS) Exposure<sup>a</sup>**

| Study type              | Reference                                                                                                                                                                                                                                                  | Disease misclassification: Was RSV diagnosis confirmed by laboratory testing? |                                                                                                                                                                 | Free of selective reporting? |                                      | Free of other bias related to environmental tobacco smoke (ETS) exposure or outcomes assessment? |                                                                                                                                                                                                                                      |
|-------------------------|------------------------------------------------------------------------------------------------------------------------------------------------------------------------------------------------------------------------------------------------------------|-------------------------------------------------------------------------------|-----------------------------------------------------------------------------------------------------------------------------------------------------------------|------------------------------|--------------------------------------|--------------------------------------------------------------------------------------------------|--------------------------------------------------------------------------------------------------------------------------------------------------------------------------------------------------------------------------------------|
|                         |                                                                                                                                                                                                                                                            | Judgment                                                                      | Description                                                                                                                                                     | Judgment                     | Description                          | Judgment                                                                                         | Description                                                                                                                                                                                                                          |
| Case-control            | Al-Shehri MA, Sadeq A, Quli K: Bronchiolitis in Abha, Southwest Saudi Arabia: viral etiology and predictors for hospital admission. West Afr J Med 2005, 24(4):299-304.                                                                                    | Unclear                                                                       | Cases only were tested for respiratory viruses with enzyme immunoassay and fluorescent antibody tests. 40% were RSV-positive                                    | Low risk                     | Multivariate analyses fully reported | High risk                                                                                        | Both cases and controls were diagnosed with bronchiolitis (participant selection bias)                                                                                                                                               |
| Cohort, cross-sectional | Al-Sonboli N, Hart CA, Al-Aghbari N, Al-Ansi A, Ashoor O, Cuevas LE: Human metapneumovirus and respiratory syncytial virus disease in children, Yemen. Emerg Infect Dis 2006, 12(9):1437-1439.                                                             | Unclear                                                                       | Children with acute respiratory infections were recruited and tested for specific viruses; 44% were RSV-positive                                                | Low risk                     | Multivariate analyses fully reported | Unclear                                                                                          | No report of how smoke exposure or other family characteristics were ascertained (exposure bias)                                                                                                                                     |
| Cohort                  | Boyce TG, Mellen BG, Mitchel EF, Jr., Wright PF, Griffin MR: Rates of hospitalization for respiratory syncytial virus infection among children in medicaid. J Pediatr 2000, 137(6):865-870.                                                                | High risk; could underestimate ETS effect                                     | ICD-9 codes for RSV infection or bronchiolitis at hospitalization                                                                                               | Low risk                     | Multivariate analyses fully reported | Low risk                                                                                         | No other bias concerns related to ETS exposure or outcomes assessment                                                                                                                                                                |
| Cohort, cross-sectional | Bradley JP, Bacharier LB, Bonfiglio J, Schechtman KB, Strunk R, Storch G, Castro M: Severity of respiratory syncytial virus bronchiolitis is affected by cigarette smoke exposure and atopy. Pediatrics 2005, 115(1):e7-14.                                | Low risk                                                                      | Lab-confirmed RSV: RSV enzyme immunoassay, direct fluorescent antibody assay, or viral culture                                                                  | Low risk                     | Multivariate analyses fully reported | Low risk                                                                                         | No other bias concerns related to ETS exposure or outcomes assessment                                                                                                                                                                |
| Cohort                  | Broughton S, Roberts A, Fox G, Pollina E, Zuckerman M, Chaudhry S, Greenough A: Prospective study of healthcare utilisation and respiratory morbidity due to RSV infection in prematurely born infants. Thorax 2005, 60(12):1039-1044.                     | Low risk                                                                      | Lab-confirmed RSV from nasopharyngeal aspirates using immunofluorescence and culture for RSV                                                                    | Low risk                     | Multivariate analyses fully reported | Low risk                                                                                         | No other bias concerns related to ETS exposure or outcomes assessment                                                                                                                                                                |
| Case-control            | Bulkow LR, Singleton RJ, Karron RA, et al. Risk factors for severe respiratory syncytial virus infection among Alaska native children. Pediatrics 2002; 109:210-6.                                                                                         | Low risk                                                                      | Lab-confirmed RSV with enzyme immunoassay and fluorescent antibody tests; patients only had to be positive by one test, but were doubly positive in 81%.        | Low risk                     | Multivariate analyses fully reported | Unclear                                                                                          | Authors noted the potential for misclassification of ETS exposure because Alaska native children spend much time indoors during the winter RSV season and could be exposed to ETS when visiting other houses or community buildings. |
| Cohort                  | Carbonell-Estrany X, Quero J: Hospitalization rates for respiratory syncytial virus infection in premature infants born during two consecutive seasons. Pediatr Infect Dis J 2001, 20(9):874-879.                                                          | Low risk                                                                      | Lab-confirmed RSV by rapid antigen testing (ELISA or immunofluorescence) in 97% of the 75.4% of rehospitalized children tested; viral cultures in the other 3%. | Low risk                     | Multivariate analyses fully reported | Low risk                                                                                         | No other bias concerns related to ETS exposure or outcomes assessment                                                                                                                                                                |
| Cohort                  | Carroll KN, Gebretsadik T, Griffin MR, Dupont WD, Mitchell EF, Wu P, Enriquez R, Hartert TV: Maternal asthma and maternal smoking are associated with increased risk of bronchiolitis during infancy. Pediatrics 2007, 119(6):1104-1112.                   | High risk; could underestimate ETS effect                                     | ICD-9 codes for RSV infection or bronchiolitis and RSV pneumonia at hospitalization                                                                             | Low risk                     | Multivariate analyses fully reported | Low risk                                                                                         | No other bias concerns related to ETS exposure or outcomes assessment                                                                                                                                                                |
| Cohort                  | Chatzimichael A, Tsalkidis A, Cassimos D, Gardikis S, Tripsianis G, Deftereos S, Ktenidou-Kartali S, Tsanakas I: The role of breastfeeding and passive smoking on the development of severe bronchiolitis in infants. Minerva Pediatr 2007, 59(3):199-206. | Unclear                                                                       | Clinical diagnosis: study participants were infants hospitalized for acute bronchiolitis                                                                        | Low risk                     | Multivariate analyses fully reported | Low risk                                                                                         | No other bias concerns related to ETS exposure or outcomes assessment                                                                                                                                                                |

**Risk of Bias Related to Assessing the Association of Serious RSV and Environmental Tobacco Smoke (ETS) Exposure<sup>a</sup>**

| Study type               | Reference                                                                                                                                                                                                                                                                                                                                                              | Disease misclassification: Was RSV diagnosis confirmed by laboratory testing? |                                                                                                                                                                                 | Free of selective reporting? |                                                                                       | Free of other bias related to environmental tobacco smoke (ETS) exposure or outcomes assessment? |                                                                       |
|--------------------------|------------------------------------------------------------------------------------------------------------------------------------------------------------------------------------------------------------------------------------------------------------------------------------------------------------------------------------------------------------------------|-------------------------------------------------------------------------------|---------------------------------------------------------------------------------------------------------------------------------------------------------------------------------|------------------------------|---------------------------------------------------------------------------------------|--------------------------------------------------------------------------------------------------|-----------------------------------------------------------------------|
|                          |                                                                                                                                                                                                                                                                                                                                                                        | Judgment                                                                      | Description                                                                                                                                                                     | Judgment                     | Description                                                                           | Judgment                                                                                         | Description                                                           |
| Case-control             | Figueras-Aloy J, Carbonell-Estrany X, Quero J: Case-control study of the risk factors linked to respiratory syncytial virus infection requiring hospitalization in premature infants born at a gestational age of 33-35 weeks in Spain. <i>Pediatr Infect Dis J</i> 2004, 23(9):815-820.                                                                               | Low risk                                                                      | Lab-confirmed RSV by immunofluorescence assay, ELISA, or virus culture.                                                                                                         | Low risk                     | Multivariate analyses fully reported                                                  | Low risk                                                                                         | No other bias concerns related to ETS exposure or outcomes assessment |
| Cohort (2-cohort)        | Figueras-Aloy J, Carbonell-Estrany X, Quero-Jimenez J, Fernandez-Colomer B, Guzman-Cabanas J, Echaniz-Urcelay I, Domenech-Martinez E: FLIP-2 Study: risk factors linked to respiratory syncytial virus infection requiring hospitalization in premature infants born in Spain at a gestational age of 32 to 35 weeks. <i>Pediatr Infect Dis J</i> 2008, 27(9):788-793. | Low risk                                                                      | Lab-confirmed RSV by immunofluorescence assay, ELISA, or virus culture.                                                                                                         | Low risk                     | Multivariate analyses fully reported                                                  | Low risk                                                                                         | No other bias concerns related to ETS exposure or outcomes assessment |
| Cohort                   | Gavin NI: Predictive accuracy of risk factors for RSV-related hospitalizations among infants in low-income families born at 32 to 35 weeks of gestation. <i>J Clin Outcomes Manage</i> 2007, 14(6):323-331.                                                                                                                                                            | High risk; could underestimate ETS effect                                     | ICD-9-CM diagnostic codes and pathogen-unspecified codes for acute bronchiolitis, viral pneumonia, bronchopneumonia, and pneumonia used                                         | Low risk                     | Multivariate analyses fully reported                                                  | Low risk                                                                                         | No other bias concerns related to ETS exposure or outcomes assessment |
| Cohort                   | Groothuis JR, Gutierrez KM, Lauer BA: Respiratory syncytial virus infection in children with bronchopulmonary dysplasia. <i>Pediatrics</i> 1988, 82(2):199-203.                                                                                                                                                                                                        | Low risk                                                                      | Lab-confirmed RSV by rapid RSV antigen tests (fluorescent antibody test and enzyme immunoassay) and for virus culture; RSV developed in 59%                                     | Low risk                     | Bivariate analysis fully reported                                                     | High risk                                                                                        | No multivariate analysis performed (confounding bias)                 |
| Case-control             | Gurkan F, Kiral A, Dagli E, Karakoc F: The effect of passive smoking on the development of respiratory syncytial virus bronchiolitis. <i>Eur J Epidemiol</i> 2000, 16(5):465-468.                                                                                                                                                                                      | Low risk                                                                      | Lab-confirmed RSV by viral antigen isolation of RSV from nasopharyngeal washes                                                                                                  | Low risk                     | Bivariate analysis fully reported                                                     | High risk                                                                                        | No multivariate analysis performed (confounding bias)                 |
| Case-control             | Hall CB, Hall WJ, Gala CL, McGill FB, Leddy JP: Long-term prospective study in children after respiratory syncytial virus infection. <i>J Pediatr</i> 1984, 105(3):358-364.                                                                                                                                                                                            | Low risk                                                                      | Lab-confirmed RSV by viral culture                                                                                                                                              | Low risk                     | Long-term study with results fully described                                          | High risk                                                                                        | No multivariate analysis performed (confounding bias)                 |
| Prospective surveillance | Hall CB, Weinberg GA, Iwane MK, Blumkin AK, Edwards KM, Staat MA, Auinger P, Griffin MR, Poehling KA, Erdman D et al: The burden of respiratory syncytial virus infection in young children. <i>N Engl J Med</i> 2009, 360(6):588-598.                                                                                                                                 | Low risk                                                                      | Lab-confirmed RSV by culture and reverse-transcriptase polymerase chain reaction (18% of the 5067 specimens were RSV-positive, and analysis was performed on this subgroup)     | Low risk                     | Multivariate analyses fully reported                                                  | Low risk                                                                                         | No other bias concerns related to ETS exposure or outcomes assessment |
| Case-control             | Hayes EB, Hurwitz ES, Schonberger LB, Anderson LJ: Respiratory syncytial virus outbreak on American Samoa. Evaluation of risk factors. <i>Am J Dis Child</i> 1989, 143(3):316-321.                                                                                                                                                                                     | Unclear                                                                       | Most patients had clinical bronchiolitis; 34 of 35 patients tested, 53% were lab-confirmed RSV-positive                                                                         | Low risk                     | Risk factors and related outcomes reported for cases, well controls, and ill controls | High risk                                                                                        | No multivariate analysis performed (confounding bias)                 |
| Cohort                   | Holberg CJ, Wright AL, Martinez FD, Ray CG, Taussig LM, Lebowitz MD: Risk factors for respiratory syncytial virus-associated lower respiratory illnesses in the first year of life. <i>Am J Epidemiol</i> 1991, 133(11):1135-1151.                                                                                                                                     | Low risk                                                                      | Lab-confirmed RSV by viral culture and immunofluorescent techniques. An episode was considered to be RSV positive if either culture, immunofluorescence, or both were positive. | Low risk                     | Multivariate analyses fully reported                                                  | Low risk                                                                                         | No other bias concerns related to ETS exposure or outcomes assessment |

**Risk of Bias Related to Assessing the Association of Serious RSV and Environmental Tobacco Smoke (ETS) Exposure<sup>a</sup>**

| Study type              | Reference                                                                                                                                                                                                                                                                                                   | Disease misclassification: Was RSV diagnosis confirmed by laboratory testing? |                                                                                                                                                                                                                  | Free of selective reporting? |                                                                                                                                                                                              | Free of other bias related to environmental tobacco smoke (ETS) exposure or outcomes assessment? |                                                                                                                                                                             |
|-------------------------|-------------------------------------------------------------------------------------------------------------------------------------------------------------------------------------------------------------------------------------------------------------------------------------------------------------|-------------------------------------------------------------------------------|------------------------------------------------------------------------------------------------------------------------------------------------------------------------------------------------------------------|------------------------------|----------------------------------------------------------------------------------------------------------------------------------------------------------------------------------------------|--------------------------------------------------------------------------------------------------|-----------------------------------------------------------------------------------------------------------------------------------------------------------------------------|
|                         |                                                                                                                                                                                                                                                                                                             | Judgment                                                                      | Description                                                                                                                                                                                                      | Judgment                     | Description                                                                                                                                                                                  | Judgment                                                                                         | Description                                                                                                                                                                 |
| Case-control            | Holman RC, Shay DK, Curns AT, Lingappa JR, Anderson LJ: Risk factors for bronchiolitis-associated deaths among infants in the United States. <i>Pediatr Infect Dis J</i> 2003, 22(6):483-490.                                                                                                               | High risk                                                                     | Not lab-confirmed RSV; bronchiolitis code on infant death certificate                                                                                                                                            | Low risk                     | Multivariate analyses fully reported                                                                                                                                                         | Low risk                                                                                         | No other bias concerns related to ETS exposure or outcomes assessment                                                                                                       |
| Cohort                  | Koehoorn M, Karr CJ, Demers PA, Lencar C, Tamburic L, Brauer M: Descriptive epidemiological features of bronchiolitis in a population-based cohort. <i>Pediatrics</i> 2008, 122(6):1196-1203.                                                                                                               | High risk; could underestimate ETS effect                                     | Not lab-confirmed RSV; bronchiolitis cases identified from ICD-9 diagnosis codes for acute bronchitis and bronchiolitis in outpatient medical charts or acute bronchiolitis in hospital discharge records        | Low risk                     | Multivariate analyses fully reported                                                                                                                                                         | Low risk                                                                                         | No other bias concerns related to ETS exposure or outcomes assessment                                                                                                       |
| Cohort                  | Law BJ, Langley JM, Allen U, et al. The Pediatric Investigators Collaborative Network on Infections in Canada study of predictors of hospitalization for respiratory syncytial virus infection for infants born at 33 through 35 completed weeks of gestation. <i>Pediatr Infect Dis J</i> 2004; 23:806-14. | Low risk                                                                      | Lab-confirmed RSV by viral culture and/or rapid test.                                                                                                                                                            | Low risk                     | Multivariate analyses fully reported                                                                                                                                                         | Low risk                                                                                         | No other bias concerns related to ETS exposure or outcomes assessment                                                                                                       |
| Cohort                  | Marbury MC, Maldonado G, Waller L: The indoor air and children's health study: methods and incidence rates. <i>Epidemiology</i> 1996, 7(2):166-174.                                                                                                                                                         | High risk; could underestimate ETS effect                                     | Diagnosis of lower-respiratory illness and bronchiolitis obtained from electronic medical records                                                                                                                | Low risk                     | Multivariate analyses fully reported                                                                                                                                                         | Low risk                                                                                         | No other bias concerns related to ETS exposure or outcomes assessment                                                                                                       |
| Case-control            | McConnochie KM, Roghmann KJ: Parental smoking, presence of older siblings, and family history of asthma increase risk of bronchiolitis. <i>Am J Dis Child</i> 1986, 140(8):806-812.                                                                                                                         | High risk; could underestimate ETS effect                                     | Diagnosis of bronchiolitis recorded in the outpatient medical record                                                                                                                                             | Low risk                     | Multivariate analyses fully reported                                                                                                                                                         | Low risk                                                                                         | No other bias concerns related to ETS exposure or outcomes assessment                                                                                                       |
| Case-control            | Nielsen HE, Siersma V, Andersen S, et al. Respiratory syncytial virus infection--risk factors for hospital admission: a case-control study. <i>Acta Paediatr</i> 2003;92:1314-21.                                                                                                                           | Low risk                                                                      | Lab-confirmed RSV by direct immunofluorescence antigen testing of nasopharyngeal aspirates                                                                                                                       | Low risk                     | Multivariate analyses fully reported                                                                                                                                                         | Low risk                                                                                         | No other bias concerns related to ETS exposure or outcomes assessment                                                                                                       |
| Cohort                  | Reese AC, James IR, Landau LI, Lesouef PN: Relationship between urinary cotinine level and diagnosis in children admitted to hospital. <i>Am Rev Respir Dis</i> 1992, 146(1):66-70.                                                                                                                         | High risk; could underestimate ETS effect                                     | Participants were children admitted to hospital with a variety of diagnoses (including respiratory illness) for whom a urinary cotinine level was available; they were given a respiratory illness questionnaire | High risk                    | "Multivariate statistical analysis" carried out, but results not clearly reported. No detail was provided on which factors were included in the model or the dependent variable of the model | Unclear                                                                                          | Risk of confounding not clear; regression analysis appears to have been performed but was insufficiently reported so not possible to tell which factors were controlled for |
| Case-control            | Reeve CA, Whitehall JS, Buettner PG, et al. Predicting respiratory syncytial virus hospitalisation in Australian children. <i>J Paediatr Child Health</i> 2006;42:248-52.                                                                                                                                   | Low risk                                                                      | Lab-confirmed RSV by direct immunofluorescence testing of nasopharyngeal aspirates                                                                                                                               | Low risk                     | Multivariate analyses fully reported                                                                                                                                                         | Low risk                                                                                         | No other bias concerns related to ETS exposure or outcomes assessment                                                                                                       |
| Cohort, cross-sectional | Somech R, Tal G, Gilad E, Mandelberg A, Tal A, Dalal I: Epidemiologic, socioeconomic, and clinical factors associated with severity of respiratory syncytial virus infection in previously healthy infants. <i>Clin Pediatr (Phila)</i> 2006, 45(7):621-627.                                                | Low risk                                                                      | Lab-confirmed RSV by enzyme immunoassay                                                                                                                                                                          | Low risk                     | Analysis fully reported                                                                                                                                                                      | High risk                                                                                        | No multivariate analysis performed (confounding bias)                                                                                                                       |

**Risk of Bias Related to Assessing the Association of Serious RSV and Environmental Tobacco Smoke (ETS) Exposure<sup>a</sup>**

| Study type                     | Reference                                                                                                                                                                                                                                                                                            | Disease misclassification: Was RSV diagnosis confirmed by laboratory testing? |                                                                                                                                                                                                                                                 | Free of selective reporting? |                                                                                                                                                               | Free of other bias related to environmental tobacco smoke (ETS) exposure or outcomes assessment? |                                                                                                                                                                             |
|--------------------------------|------------------------------------------------------------------------------------------------------------------------------------------------------------------------------------------------------------------------------------------------------------------------------------------------------|-------------------------------------------------------------------------------|-------------------------------------------------------------------------------------------------------------------------------------------------------------------------------------------------------------------------------------------------|------------------------------|---------------------------------------------------------------------------------------------------------------------------------------------------------------|--------------------------------------------------------------------------------------------------|-----------------------------------------------------------------------------------------------------------------------------------------------------------------------------|
|                                |                                                                                                                                                                                                                                                                                                      | Judgment                                                                      | Description                                                                                                                                                                                                                                     | Judgment                     | Description                                                                                                                                                   | Judgment                                                                                         | Description                                                                                                                                                                 |
| <b>Case-control</b>            | Stensballe LG, Kristensen K, Simoes EA, Jensen H, Nielsen J, Benn CS, Aaby P: Atopic disposition, wheezing, and subsequent respiratory syncytial virus hospitalization in Danish children younger than 18 months: a nested case-control study. <i>Pediatrics</i> 2006, 118(5):e1360-1368.            | Low risk                                                                      | Lab-confirmed RSV through database containing "result of the RSV test"                                                                                                                                                                          | Low risk                     | Multivariate analyses fully reported                                                                                                                          | Low risk                                                                                         | No other bias concerns related to ETS exposure or outcomes assessment                                                                                                       |
| <b>Cohort, cross-sectional</b> | Sritippayawan S, Prapphal N, Wong P, Tosukhowong P, Samransamruajkit R, Deerojanawong J: Environmental tobacco smoke exposure and respiratory syncytial virus infection in young children hospitalized with acute lower respiratory tract infection. <i>J Med Assoc Thai</i> 2006, 89(12):2097-2103. | Low risk                                                                      | Children hospitalized for LRI were included; lab-confirmed RSV (RSV antigen assay performed by indirect immunofluorescent antibody technique) group compared to non-RSV group; urinary cotinine measured and technician blinded to patient data | High risk                    | "Multinomial logistic regression" performed, but results for only one significant factor were reported, and other factors included in model were not provided | Unclear                                                                                          | Risk of confounding not clear; regression analysis appears to have been performed but was insufficiently reported so not possible to tell which factors were controlled for |
| <b>Cohort</b>                  | von Linstow ML, Hogh M, Nordbo SA, Eugen-Olsen J, Koch A, Hogh B: A community study of clinical traits and risk factors for human metapneumovirus and respiratory syncytial virus infection during the first year of life. <i>Eur J Pediatr</i> 2008, 167(10):1125-1133.                             | Low risk                                                                      | Lab-confirmed RSV from nasal swabs of symptomatic children                                                                                                                                                                                      | Low risk                     | Multivariate analyses fully reported                                                                                                                          | Low risk                                                                                         | No other bias concerns related to ETS exposure or outcomes assessment                                                                                                       |

<sup>a</sup> Risk of bias related to adequate sequence generation, allocation concealment, blinding of participants and personnel, or blinding of outcome assessment is not relevant to noninterventional studies such as the ones included in this literature review. Assessments for these types of bias have not been included as all would be "not applicable."

## Description of Ratings for Assessment of Bias Risk Related to the Association of Serious RSV and Environmental Tobacco Smoke Exposure

|                                                           | Low Risk                                                                                                                                                | High Risk                                                                                                                      | Unclear                                                                                                                 |
|-----------------------------------------------------------|---------------------------------------------------------------------------------------------------------------------------------------------------------|--------------------------------------------------------------------------------------------------------------------------------|-------------------------------------------------------------------------------------------------------------------------|
| <b>Disease misclassification</b>                          | Lab-confirmed RSV                                                                                                                                       | Diagnostic codes or diagnoses recorded from medical records (various) or cause of death from death certificate (bronchiolitis) | Clinical diagnosis or analysis performed on data from participants with a variety of lower respiratory tract infections |
| <b>Selective reporting</b>                                | Variables assessed in models or analyzed are adequately described and significant results are detailed                                                  | Study results not adequately or clearly reported (e.g., list of factors included in the multivariate model not provided)       | [None]                                                                                                                  |
| <b>Other bias</b>                                         |                                                                                                                                                         |                                                                                                                                |                                                                                                                         |
| <i>Confounding bias</i>                                   | Multivariate analysis                                                                                                                                   | Univariate or bivariate analysis only                                                                                          | Inadequate reporting makes it impossible to tell which potentially confounding factors were controlled for              |
| <i>Exposure bias</i>                                      | Passive smoke exposure assessed through cotinine level, parent-reported questionnaire, maternal smoking data from birth certificate, or medical records | [None]                                                                                                                         | Smoke exposure variable not defined                                                                                     |
| <i>Participant selection bias in case-control studies</i> | Healthy controls without RSV or respiratory disease                                                                                                     | Controls were ill with non-RSV disease (instead of healthy controls)                                                           | Not possible to determine health status of controls                                                                     |
